# Supplementary material for: Antenatal care services in Benin and Tanzania 2021/2022: an equity analysis study
Source: PubMed Central journal article supplement — BMJ Public Health. Author manuscript; Available in PMC 2024 Jun 14. (PMC11177242; doi:10.1136/bmjph-2023-000547), 2024-03
Supplement: NIHMS1996415-supplement-supplement.pdf [file NIHMS1996415-supplement-supplement.pdf]

## Antenatal care services in Benin and Tanzania 2021/2022: an equity analysis study

Ochieng, et. al.

### SUPPLEMENTAL FILES

**Supplemental Table 1: Slope and relative indices of inequality by education and wealth: Benin and Tanzania**

| Indicator                               | Benin              |                 | Tanzania          |                 |
|-----------------------------------------|--------------------|-----------------|-------------------|-----------------|
|                                         | SII                | RII             | SII               | RII             |
| <b>Education</b>                        |                    |                 |                   |                 |
| <b>Gestation age 1<sup>st</sup> ANC</b> | -.63(.12) ***      | .827(.031) ***  | -.69(.13) ***     | .872(.023) ***  |
| <b>Total ANC visits</b>                 | .84(.20) ***       | 1.272(.073) *** | .78(.13) ***      | 1.267(.052) *** |
| <b>Quality of ANC</b>                   |                    |                 |                   |                 |
| Urinalysis                              | .56(.40)           | 1.521(.437) *** | .21(.05) ***      | 1.452(.137) *** |
| BP monitoring                           | .00(.01)           | 1.00(.013)      | .12(.04) ***      | 1.209(.074) *** |
| Blood sample                            | .02(.02)           | 1.025(.025) *   | .04(.02) *        | 1.048(.025) *** |
| IPTp doses                              | .29(.09) ***       | 1.136(.048) *** | .59(.17) ***      | 1.294(.101) *** |
| Received ITN                            | .08(.04) *         | 1.128(.080) *** | .07(.03) **       | 1.086(.036) *** |
| <b>Waiting time</b>                     | -13.68(7.46)       | .859(.071) ***  | -30.85(9.44) ***  | .729(.070) ***  |
| <b>Time away from home</b>              | -19.14(7.06)<br>** | .911(.031) ***  | -48.61(10.51) *** | .823(.035) ***  |
| <b>Birthweight</b>                      | 21.92(67.93)       | 1.008(.0243)    | -18.53(55.19)     | .994(.017)      |
| <b>Wealth</b>                           |                    |                 |                   |                 |
| <b>Gestation age 1<sup>st</sup> ANC</b> | -.78(.12) ***      | .789(.028) ***  | -.57(.12) ***     | .892(.021) ***  |
| <b>Total ANC visits</b>                 | 1.44(.18) ***      | 1.516(.080) *** | .67(.13) ***      | 1.225(.048) *** |
| <b>Quality of ANC</b>                   |                    |                 |                   |                 |
| Urinalysis                              | -.01(.02)          | .992(.016)      | .21(.06) ***      | 1.453(.160) *** |
| BP monitoring                           | .01(.02)           | 1.01(.023)      | .13(.05) **       | 1.228(.091) *** |
| Blood sample                            | .04(.02) *         | 1.048(.025) **  | .02(.02)          | 1.02(.019) *    |
| IPTp doses                              | .34(.08) ***       | 1.164(.039) *** | .53(.19) ***      | 1.258(.108) *** |
| Received ITN                            | -.04(.06)          | .944(.083)      | .02(.03)          | 1.028(.034) *** |
| <b>Waiting time</b>                     | 6.85(7.00)         | 1.079(.083)     | -27.49(8.00) ***  | .754(.063) ***  |
| <b>Time away from home</b>              | .32(11.39)         | 1.002(.055)     | -47.24(12.39) *** | .827(.042) ***  |
| <b>Birthweight</b>                      | 58.23(84.65)       | 1.021(.031) *** | 94.29(54.39)      | 1.029(.017) **  |

\* $p \leq .05$ , \*\*  $p \leq .01$ , \*\*\*  $p \leq .001$ . SII = Slope index of inequality, RII = Relative index of inequality

**Supplemental Table 2: Concentration indices by wealth and education – Benin and Tanzania.**

Standard errors in parenthesis.

| Indicator                               | Benin           |       |                 |       | Tanzania        |       |                 |       |
|-----------------------------------------|-----------------|-------|-----------------|-------|-----------------|-------|-----------------|-------|
|                                         | Wealth          |       | Education       |       | Wealth          |       | Education       |       |
|                                         | CI              | Int.  | CI              | Int.  | CI              | Int.  | CI              | Int.  |
| <b>Gestation age 1<sup>st</sup> ANC</b> | -.030(.005) *** | -2.2% | -.020(.005) *** | -1.5% | -.023(.005) *** | -1.7% | -.019(.005) *** | -1.4% |
| <b>Total ANC visits</b>                 | .069(.007) ***  | 5.2%  | .036(.007) ***  | 2.7%  | .032(.005) ***  | 2.4%  | .028(.005) ***  | 2.1%  |
| <b>Quality of ANC</b>                   |                 |       |                 |       |                 |       |                 |       |
| Urinalysis                              | -.002(.003)     | -.1%  | .002(.003)      | .1%   | .049(.008) ***  | 3.6%  | .038(.008) ***  | 2.9%  |
| BP Check                                | .003(.002)      | .2%   | .000(.002)      | .0%   | .025(.007) ***  | 1.9%  | .019(.007) ***  | 1.4%  |
| Blood sample                            | .006(.004)      | .5%   | .003(.003)      | .3%   | .004(.003)      | .3%   | .005(.002) *    | .4%   |
| IPTp doses                              | .018(.037)      | 1.4%  | -.048(.038)     | -.0%  | .026(.008) ***  | 1.9%  | .026(.008) ***  | 1.9%  |
| Received ITN                            | -.009(.007)     | -.6%  | .017(.007) **   | 1.3%  | .006(.005)      | .5%   | .009(.005)      | .0%   |
| <b>Waiting time</b>                     | .013(.008)      | .0%   | -.023(.008)     | -1.7% | -.043(.010) *** | -3.2% | -.038(.010) *** | -2.9% |
| <b>Time away from home</b>              | .003(.005)      | .2%   | -.012(.005) *** | -.9%  | -.035(.006) *** | -2.6% | -.023(.007) *** | -1.7% |
| <b>Birthweight</b>                      | .004(.004)      | .3%   | -.000(.004)     | -.0%  | .003(.003)      | .3%   | -.000(.003)     | -.0%  |

\* $p \leq .05$ , \*\*  $p \leq .01$ , \*\*\*  $p \leq .001$ . CI – Kakwani's concentration index. Int. – Interpretation (Kakwani index \* 75 to convert it into percentage)

**Supplemental Table 3: Decomposed concentration index: Benin and Tanzania**

|                        | Benin      |                     |              | Tanzania   |                     |              |
|------------------------|------------|---------------------|--------------|------------|---------------------|--------------|
|                        | Elasticity | Concentration index | Contribution | Elasticity | Concentration index | Contribution |
| Wealth                 | .167       | .107                | .276         | .009       | .107                | .044         |
| Married                | .090       | .001                | .002         | .052       | .001                | .003         |
| Spousal support        | .179       | .020                | .056         | .097       | .022                | .085         |
| Education              | .059       | .202                | .185         | .085       | .209                | .749         |
| Age                    | 1.743      | -.020               | -.453        | .564       | -.020               | -.411        |
| Age squared            | -.894      | -.043               | .405         | -.282      | -.042               | .358         |
| Household members      | .004       | -.032               | -.002        | -.018      | -.025               | .023         |
| ITN ownership          | .012       | .023                | .004         | .021       | .022                | .021         |
| Distance               | .039       | -.026               | -.014        | .008       | -.020               | -.008        |
| Total births           | -.111      | -.108               | .164         | -.049      | -.089               | .201         |
| Under-5                | -.149      | -.030               | .068         | -.065      | -.026               | .082         |
| Facility fixed effects |            |                     | .013         |            |                     | .285         |

**Supplemental Table 4: Oaxaca decomposition by bivariate poverty status**

|                      | Benin       |                | Tanzania    |                |
|----------------------|-------------|----------------|-------------|----------------|
|                      | Coefficient | 95% CI         | Coefficient | 95% CI         |
| <b>Differential</b>  |             |                |             |                |
| Prediction poor      | 3.281***    | [3.188, 3.373] | 3.262***    | [3.191, 3.332] |
| Prediction nonpoor   | 4.102***    | [3.927, 4.278] | 3.646***    | [3.522, 3.769] |
| Difference           | -.822***    | [-1.02, -.623] | -.384***    | [-.526, -.242] |
| <b>Decomposition</b> |             |                |             |                |
| Endowments           | -.092***    | [-.161, -.024] | -.131***    | [-.193, -.068] |
| Coefficients         | -.681***    | [-.896, -.465] | -.181**     | [-.341, .020]  |
| Interactions         | -.049       | [-.167, .069]  | -.072       | [-.175, .030]  |

\*\*  $p < .01$ , \*\*\*  $p < .001$ .

**Figure S1: Slope and relative indices of inequality for total ANC visits: Benin and Tanzania**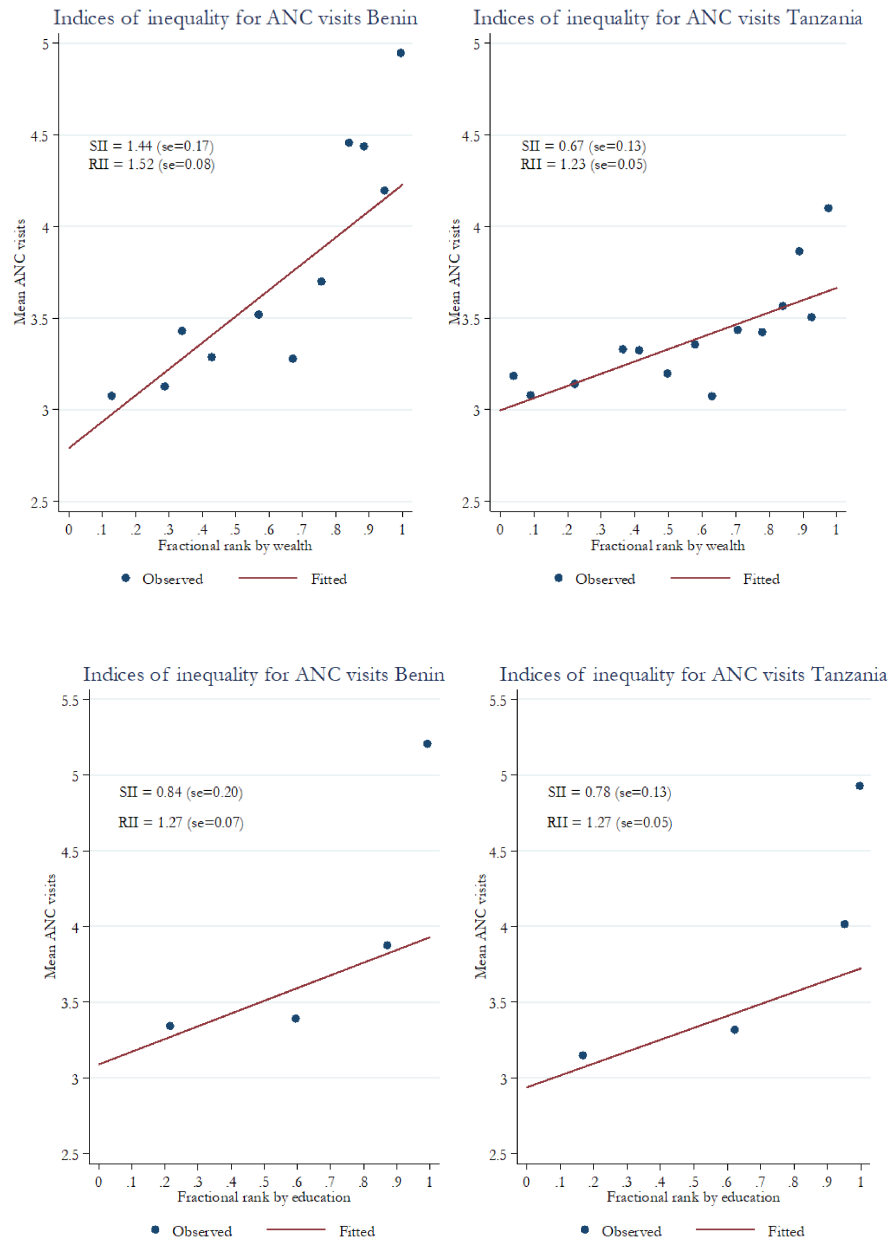

These show an absolute difference (SII) and a proportional difference (RII) in inequality in total ANC contacts by wealth and education in both countries.

**Figure S2: Concentration curves for total ANC visits by education and wealth: Benin and Tanzania.**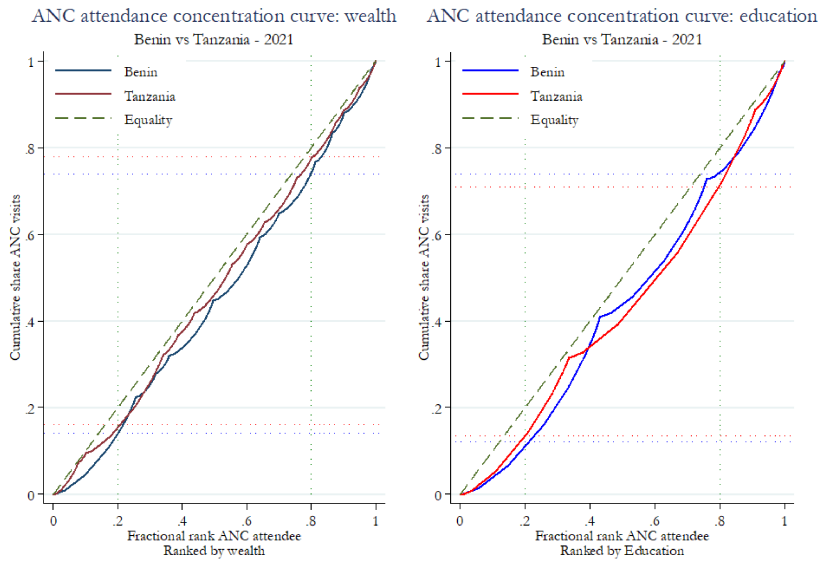

The concentration index measures the degree and magnitude of the distribution of a health variable e.g., ANC contacts across different SES groups. In the example of Tanzania, the concentration index is interpreted as follows: a reallocation of 2.4% of ANC visits from the upper half to the lower half of the income distribution would lead to the achievement of perfect equality. Note that the perfect equality is not the same as attainment of the minimal recommended number of visits.<sup>19</sup>

**Figure S3. Government financing concentration curve**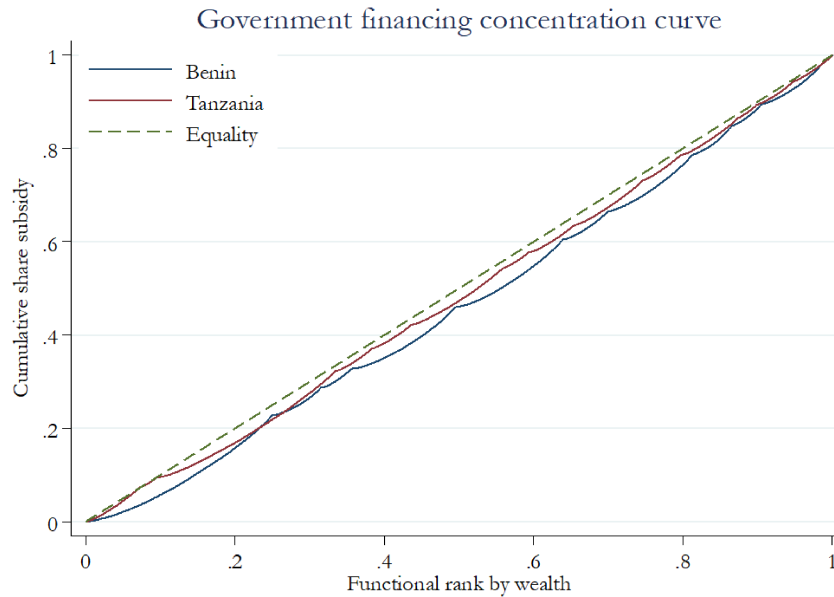

The figure shows that the benefit incidence of government financing is pro-rich across the entire wealth distribution in both countries. While the Tanzania curve lies above the Benin curve (more equitable), the curves intersect at a few points, indicating that this difference is not statistically significant.
